# Supplementary material
Source: Springer Nature journal article supplement (https://www.springermedizin.de/resource/supplementary/13089_2014_108_MOESM6_ESM.pdf/9675700)
Supplement: MOESM6 [file 9675700]

A

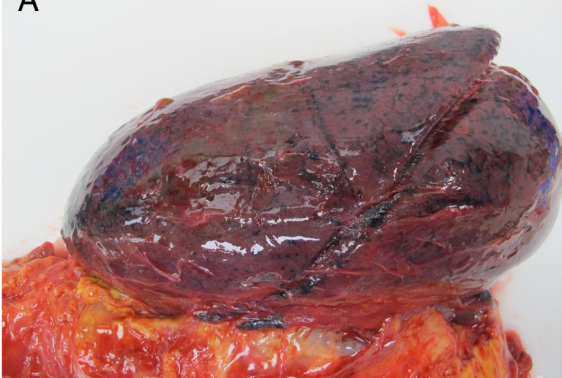

B

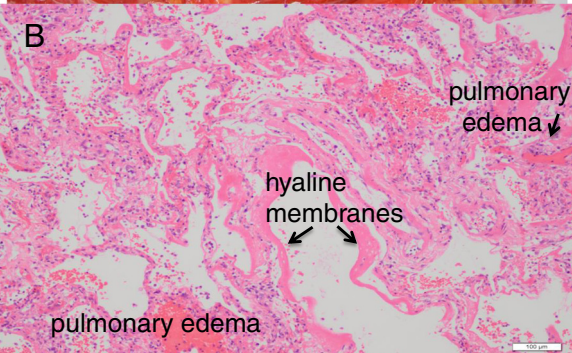

pulmonary edema ↓

hyaline membranes  
↙ ↘

pulmonary edema

100 μm
